# Supplementary material for: Associations between the rs5498 (A > G) and rs281432 (C > G) polymorphisms of the ICAM1 gene and atherosclerotic cardiovascular disease risk, including hypercholesterolemia
Source: PeerJ. 2022 Mar 8;10:e12972. doi: 10.7717/peerj.12972 (PMC8916030; doi:10.7717/peerj.12972)
Supplement: Data S1 [file peerj-10-12972-s002.xlsx]

## Sheet: DATA
Participants Code	Group	Age (years)	Gender	Smoking status	Alcohol consumption	Excercise	Systolic BP (mmHg)	Diastolic BP (mmHg)	Heart rate (beats/min)	BMI (kg/m2)	Waist cir. (cm)	Hip cir. (cm)	Waist to hip ratio (WHR)	TC (mmol/L)	LDL-C (mmol/L)	HDL-C (mmol/L)	TG (mmol/L)	TG/HDL-C ratio	ICAM1 mRNA level	ICAM1 rs5498 (A>G)	ICAM1 rs281432 (C>G)
001	Normal control	41	Female	Never	Drinking	No	123	80	100	27.95	88	101	0.87	4.71	2.77	1.5	0.98	0.65	0.75	AA	CC
002	Normal control	55	Male	Never	Drinking	No	127	82	64	27.45	96.3	93.3	1.03	5.17	3.08	1.47	1.37	0.93	0.99	AA	GG
003	Normal control	48	Male	Smoking	Drinking	No	120	70	75	16.8	72	82	0.88	4.91	3.08	1.32	1.13	0.86	1.85	GG	CG
004	Normal control	43	Male	Never	Drinking	No	117	72	55	19.18	70	86.5	0.81	4.58	2.95	0.88	1.65	1.87	1.18	AG	CC
005	Hypercholesterolemia	55	Male	Smoking	Drinking	No	125	77	92	19.27	78.6	84.3	0.93	3.28	0.72	0.52	4.46	8.62	1.41	AA	CC
006	Normal control	57	Female	Smoking	Never	No	130	80	86	29.4	90	110	0.82	5.12	3.41	1.16	1.2	1.03	1.85	AA	CG
007	Normal control	43	Male	Never	Never	Yes	127	84	82	28.1	98.5	102.9	0.96	5.04	3.36	1.03	1.43	1.39	0.15	GG	CG
008	Hypercholesterolemia	50	Female	Never	Drinking	No	138	87	81	33.94	97	104.8	0.93	5.69	3.41	1.66	1.33	0.8	1.56	GG	CC
009	Hypercholesterolemia	59	Female	Never	Never	No	117	71	99	33.1	98	107.5	0.91	4.32	2.33	1.03	2.1	2.03	2.14	AA	CG
010	Normal control	50	Male	Smoking	Drinking	No	115	70	62	27.56	93	100	0.93	4.91	2.84	1.5	1.24	0.83	1.06	AA	CG
011	Normal control	45	Female	Never	Never	No	125	81	83	32.79	100	110	0.91	5.64	3.21	1.45	2.13	1.47	1.08	AA	CC
012	Hypercholesterolemia	52	Female	Never	Never	No	129	70	95	31.35	93	101	0.92	5.66	3.31	1.09	2.75	2.54	0.48	AA	CC
013	Hypercholesterolemia	56	Female	Never	Never	No	129	78	82	26.34	95	102	0.93	6.96	4.76	1.55	1.4	0.9	0.18	AG	CG
014	Hypercholesterolemia	53	Female	Never	Never	No	115	70	82	24.06	86	96	0.9	5.97	3.85	1.66	1	0.61	0.3	AG	CG
015	Normal control	41	Female	Never	Drinking	Yes	126	80	85	26.18	84	97.5	0.86	5.2	3.36	1.32	1.14	0.86	1.19	AG	CG
016	Normal control	54	Male	Never	Drinking	No	130	80	78	27.77	95.5	98.5	0.97	4.65	2.04	1.27	2.94	2.32	3.51	AG	CG
017	Normal control	38	Female	Never	Drinking	No	143	79	81	27.4	92	102	0.9	4.19	1.76	1.45	2.13	1.47	1.45	AA	CG
018	Hypercholesterolemia	46	Female	Never	Never	No	168	90	83	38.95	102	110	0.93	5.77	3.39	1.5	1.9	1.26	2.45	AA	CC
019	Hypercholesterolemia	41	Male	Never	Drinking	No	111	75	64	21.87	74.2	84.5	0.88	5.69	3.52	1.66	1.13	0.68	1.41	AA	CG
020	Hypercholesterolemia	47	Male	Smoking	Never	No	133	80	78	26.83	88.5	94	0.94	5.04	3.08	0.83	2.46	2.97	1.36	AG	CG
021	Hypercholesterolemia	55	Female	Never	Never	No	132	90	78	37.32	98.5	114	0.86	5.35	3.39	1.22	1.61	1.33	0.19	AG	CG
022	Normal control	38	Female	Never	Never	No	115	73	64	29.1	96	103	0.93	3.57	1.97	1.01	1.3	1.29	5.68	AA	CG
023	Normal control	48	Female	Never	Never	No	124	74	84	20.27	63	82	0.77	4.97	2.79	1.47	1.55	1.05	3.01	AA	CG
024	Normal control	41	Female	Never	Never	No	131	87	73	28.54	90	106	0.85	4.89	3	1.32	1.22	0.92	3.27	GG	CG
025	Hypercholesterolemia	57	Female	Never	Never	No	119	75	81	32.55	110	114	0.96	6.96	3.7	0.62	1.28	2.06	1.62	AG	CG
026	Normal control	45	Female	Never	Never	No	114	75	95	29.6	86	106	0.81	4.76	2.84	1.4	1.11	0.79	0.47	AG	CG
027	Normal control	51	Female	Never	Never	No	109	75	81	37.24	104	111	0.94	5.48	3.26	1.58	1.42	0.9	3.31	AA	CC
028	Hypercholesterolemia	43	Female	Never	Never	No	128	86	82	41.89	93	95.5	0.98	5.48	3.88	1.16	0.98	0.84	0.82	AA	CC
029	Hypercholesterolemia	43	Female	Never	Never	No	107	63	76	25.78	81	95.5	0.85	4.29	2.38	0.98	2.02	2.06	2.61	AG	CG
030	Normal control	46	Male	Smoking	Drinking	No	109	68	58	26.28	84	92.5	0.91	4.5	2.69	1.47	0.71	0.48	0.36	AA	GG
031	Hypercholesterolemia	46	Male	Never	Drinking	No	131	89	97	25.56	81	88.5	0.92	4.42	2.66	0.8	2.09	2.61	2.86	AA	CG
032	Normal control	52	Female	Never	Drinking	No	123	71	67	27.96	85	97	0.88	4.84	2.51	2.02	0.69	0.34	8.54	AA	CG
033	Normal control	42	Male	Never	Never	No	112	61	78	31.71	100	97.5	1.03	3.78	2.3	0.85	1.37	1.6	2.11	AA	CG
034	Hypercholesterolemia	52	Female	Never	Drinking	No	134	82	93	29.16	98.5	104	0.95	4.68	2.69	1.01	2.15	2.13	0.48	GG	CG
035	Hypercholesterolemia	43	Female	Never	Drinking	No	128	75	72	26.32	89.3	96.5	0.93	4.5	2.22	0.96	2.87	3	1.62	AA	CC
036	Hypercholesterolemia	48	Female	Never	Never	No	120	75	123	16.53	68.6	76	0.9	8.48	4.14	1.11	1.52	1.37	5.26	AG	CC
037	Hypercholesterolemia	43	Male	Smoking	Drinking	No	129	95	94	24.76	88	92	0.96	5.4	2.79	1.01	3.48	3.45	1.39	AA	CC
038	Normal control	46	Female	Never	Never	No	108	70	63	24.52	79	93.5	0.84	2.82	1.01	1.16	1.4	1.2	1.1	AA	CC
039	Hypercholesterolemia	51	Male	Smoking	Drinking	No	117	74	66	23.05	84	90	0.93	6.03	3.96	1.4	1.46	1.04	0.16	AG	CG
040	Hypercholesterolemia	58	Male	Smoking	Drinking	Yes	137	75	73	25.42	91	90	1.01	4.19	1.71	1.09	3.05	2.81	1.15	AA	CC
041	Hypercholesterolemia	39	Female	Never	Never	No	126	85	67	27.7	90.5	104	0.87	4.99	3.47	1.24	0.6	0.48	7.26	GG	CG
042	Hypercholesterolemia	50	Female	Never	Never	No	133	83	72	27.8	78.5	95	0.83	6.44	4.24	1.68	1.12	0.66	0.46	AA	CC
043	Normal control	38	Female	Never	Never	No	131	86	90	43	106	128	0.83	3.93	2.25	1.16	1.13	0.97	1.35	AG	GG
044	Normal control	41	Female	Never	Never	No	128	91	96	35.76	104	111	0.94	4.63	2.84	1.14	1.41	1.24	0.54	AA	CC
045	Normal control	45	Female	Never	Drinking	No	117	73	91	29.92	98	111.5	0.88	4.68	2.79	1.27	1.37	1.08	1.93	GG	GG
046	Hypercholesterolemia	43	Female	Never	Never	No	121	86	88	20.84	76.5	89.5	0.85	5.43	3.36	1.47	1.3	0.88	1.67	GG	GG
047	Normal control	57	Female	Never	Never	No	135	73	74	26.57	93	95.5	0.97	4.22	2.07	1.27	1.9	1.5	0.44	AA	CC
048	Hypercholesterolemia	56	Female	Smoking	Drinking	No	159	81	81	25.8	92	104	0.88	6.8	4.65	1.89	1.94	1.03	1.07	AA	CG
049	Hypercholesterolemia	47	Female	Never	Never	No	124	83	70	24.19	82	90.5	0.91	5.4	3.21	0.91	2.82	3.12	1.39	AA	CG
050	Hypercholesterolemia	48	Female	Never	Never	No	118	75	79	31.11	96	100	0.96	6.03	4.14	0.91	2.15	2.37	0.27	AG	CG
051	Hypercholesterolemia	52	Female	Never	Drinking	No	139	86	83	26.62	97.5	99	0.98	5.2	3.26	1.03	1.99	1.92	2.14	AA	CC
052	Normal control	52	Female	Never	Never	No	159	96	68	32.57	104	103.5	1	4.55	2.22	1.66	1.47	0.89	0.17	AA	CC
053	Hypercholesterolemia	45	Male	Never	Drinking	No	143	88	87	28.37	91.5	101.5	0.9	5.43	3.03	0.93	3.23	3.47	0.33	GG	GG
054	Normal control	42	Male	Smoking	Drinking	Yes	108	73	59	22.14	77	84	0.92	4.84	2.92	1.55	0.79	0.51	0.18	AA	CG
055	Hypercholesterolemia	44	Female	Never	Never	No	100	65	68	21.79	82	87	0.94	6.67	4.58	1.45	1.41	0.97	2.13	AA	CC
056	Hypercholesterolemia	46	Male	Smoking	Drinking	No	116	74	74	21.34	69.5	86	0.81	6.88	4.58	1.16	2.48	2.13	1.07	AA	CC
057	Hypercholesterolemia	58	Male	Smoking	Drinking	No	154	86	80	23.76	87	92	0.95	4.68	3.05	0.75	1.94	2.59	0.29	AA	CG
058	Hypercholesterolemia	51	Female	Never	Never	No	120	83	80	31.95	94.5	104.5	0.9	3.7	1.81	1.03	1.84	1.78	0.59	AA	CG
059	Hypercholesterolemia	48	Female	Never	Never	No	132	69	81	22.53	68	88	0.77	6.08	3.96	1.81	0.69	0.38	1.13	AA	CC
060	Hypercholesterolemia	53	Female	Never	Drinking	No	120	73	86	29.71	100.5	99.5	1.01	5.53	3.72	1.14	1.49	1.31	2.15	AG	CC
061	Normal control	54	Male	Never	Drinking	Yes	122	66	71	26.46	88	97	0.91	4.37	2.33	1.47	1.25	0.85	5.12	AG	CG
062	Normal control	58	Male	Never	Never	No	126	82	70	22.38	80	89.5	0.89	5.07	3.57	1.03	0.99	0.96	0.23	AG	GG
063	Hypercholesterolemia	58	Female	Never	Never	No	122	67	83	26.47	85.5	96	0.89	8.79	6.98	1.11	1.54	1.38	1.67	AG	CG
064	Normal control	55	Female	Never	Never	No	146	59	101	23.81	84.5	88	0.96	4.6	2.72	1.27	1.33	1.05	7.73	AG	CG
065	Hypercholesterolemia	44	Female	Smoking	Drinking	No	134	82	92	24.13	87	92	0.95	6.13	4.03	1.34	1.65	1.23	5.8	AG	CC
066	Hypercholesterolemia		Female	Smoking	Drinking	Yes	159	93	71	22.99	88.5	95	0.93	4.65	2.38	1.16	2.44	2.1	9.94	AG	CC
067	Normal control	49	Male	Never	Never	No	113	62	83	24.08	86.5	90	0.96	5.43	3.23	1.71	1.05	0.62	0.18	AA	CC
068	Normal control	55	Male	Never	Drinking	Yes	147	87	112	34.48	108.5	107	1.01	4.01	2.43	0.88	1.51	1.72	4.11	AG	CG
069	Hypercholesterolemia	52	Female	Never	Never	No	119	70	62	32.84	100	105.5	0.95	5.64	3.44	1.76	0.94	0.53	1.01	AG	CG
070	Normal control	50	Female	Never	Never	No	142	78	58	28.92	101	102.5	0.99	4.78	2.95	1.22	1.37	1.12	1.5	AA	GG
071	Hypercholesterolemia	43	Male	Never	Drinking	No	141	93	103	28.55	90	96	0.94	6	3.88	1.53	1.3	0.85	1.56	AG	CG
072	Normal control	55	Male	Smoking	Drinking	No	118	78	84	25.23	89.5	88	1.02	4.5	2.3	1.03	2.53	2.44	1.9	AG	CG
073	Hypercholesterolemia	49	Male	Smoking	Drinking	No	109	77	72	26.13	93	97	0.96	6.03	3.47	1.42	2.48	1.75	0.64	AA	CC
074	Hypercholesterolemia	45	Female	Never	Never	No	136	96	75	29.94	90.5	104	0.87	4.71	2.84	0.96	1.98	2.06	3.63	AG	CG
075	Normal control	48	Female	Never	Drinking	No	116	73	77	28.22	89	103.5	0.86	3.83	2.04	1.42	0.77	0.54	0.58	AG	CG
076	Hypercholesterolemia	49	Female	Never	Never	No	126	75	78	29.39	100.7	102.5	0.98	5.07	3.39	1.06	1.38	1.3	9.92	AG	GG
077	Hypercholesterolemia	58	Male	Never	Drinking	No	117	61	76	17.89	70.5	78.7	0.9	2.87	1.24	0.96	1.48	1.55	3.17	AG	CG
078	Normal control	43	Female	Never	Never	No	148	92	87	28.12	83.5	101	0.83	4.94	2.92	1.76	0.56	0.32	1.15	AG	CG
079	Hypercholesterolemia	45	Male	Never	Never	No	141	90	85	32.89	90.5	102.5	0.88	3.83	2.43	0.75	1.41	1.88	2.14	AG	CG
080	Normal control	44	Female	Never	Drinking	No	132	88	71	34.76	113.5	117	0.97	4.4	2.82	1.32	0.55	0.42	5.35	AG	CG
081	Normal control	40	Male	Never	Never	No	160	86	76	19.3	67	80	0.84	2.72	1.34	1.19	0.41	0.34	0.21	AA	CC
082	Hypercholesterolemia	53	Male	Smoking	Drinking	No	119	81	83	37.59	112.5	113	1	4.71	3.26	0.8	1.43	1.79	1.15	AA	CC
083	Normal control	55	Male	Smoking	Never	No	109	74	68	23.41	75	85	0.88	4.45	2.92	1.01	1.15	1.14	7.04	AA	CG
084	Hypercholesterolemia	56	Female	Never	Never	No	134	63	86	23.08	84.5	88.5	0.95	6.15	3.28	1.32	3.41	2.59	0.42	AA	CG
085	Hypercholesterolemia	44	Female	Never	Never	No	115	77	70	35.01	92.5	110.5	0.84	5.74	3.7	1.5	1.2	0.8	4.87	AG	CG
086	Hypercholesterolemia	39	Male	Smoking	Drinking	No	138	88	88	38.49	117	119.5	0.98	5.2	3.59	0.91	1.55	1.71	2.87	AA	CG
087	Hypercholesterolemia	45	Female	Never	Drinking	No	143	97	107	27.72	91	97	0.94	5.97	4.01	1.06	1.98	1.86	1.26	AA	CC
088	Hypercholesterolemia	45	Female	Never	Drinking	No	104	55	75	28.8	89	98.5	0.9	5.33	3.44	1.34	1.17	0.87	0.25	AG	CG
089	Hypercholesterolemia	45	Female	Smoking	Drinking	No	125	78	91	25.92	89.4	99	0.9	6.26	3.1	2.09	1.75	0.84	0.91	AA	CG
090	Hypercholesterolemia	47	Male	Smoking	Drinking	No	125	73	84	22.99	77.3	82.5	0.94	5.28	3.78	1.16	0.76	0.65	0.39	GG	GG
091	Normal control	40	Female	Never	Never	No	121	81	90	32.26	101.5	100.5	1.01	4.03	2.61	1.14	0.64	0.57	4.74	AG	CG
092	Hypercholesterolemia	43	Male	Never	Drinking	No	122	67	86	27.51	91	94.5	0.96	5.59	3.67	1.45	1.03	0.71	9.97	AA	CC
093	Normal control	44	Male	Smoking	Drinking	Yes	124	80	60	26.23	85.5	92.5	0.92	3.08	1.27	1.22	1.28	1.05	2.33	AA	CG
094	Normal control	56	Female	Never	Never	No	128	80	71	32.05	105	107	0.98	4.76	2.53	1.66	1.25	0.76	7.78	GG	CC
095	Normal control	44	Male	Never	Never	No	116	66	90	20.11	71	81	0.88	4.32	2.61	1.19	1.15	0.97	1.15	AG	CG
096	Hypercholesterolemia	56	Female	Never	Never	No	112	72	105	27.33	95	103	0.92	5.66	3.08	1.73	1.85	1.07	2.91	AG	CG
097	Hypercholesterolemia	48	Female	Never	Never	No	139	77	67	19.88	81	86.5	0.94	5.87	3.57	1.71	1.32	0.77	3.02	AG	CG
098	Hypercholesterolemia	56	Female	Smoking	Never	No	170	88	76	28.99	92	101.5	0.91	5.66	3.72	1.24	1.51	1.22	0.15	AA	CC
099	Hypercholesterolemia	47	Female	Never	Drinking	No	157	96	86	24.49	82.5	91.5	0.9	4.29	1.66	1.01	3.53	3.5	4.21	AG	GG
100	Normal control	47	Female	Never	Never	No	126	82	61	24.8	93.5	95	0.98	4.14	2.28	1.32	1.17	0.89	6.21	GG	CG
101	Hypercholesterolemia	43	Female	Never	Drinking	No	109	75	84	26.3	87.5	98	0.89	5.95	3.67	1.34	2.02	1.5	4.41	AG	CC
102	Normal control	55	Male	Smoking	Drinking	No	135	74	67	22.31	85.5	87	0.98	4.16	2.92	0.8	0.94	1.17	1.1	AA	CC
103	Normal control	37	Female	Never	Never	No	129	82	85	28.54	97	100	0.97	4.86	2.12	2.02	1.58	0.78	0.86	AA	CG
104	Hypercholesterolemia	48	Male	Smoking	Drinking	Yes	145	98	69	29.16	96.5	97	0.99	4.03	1.5	1.27	2.77	2.18	0.34	AA	CG
105	Hypercholesterolemia	51	Female	Never	Never	No	142	78	62	31.02	99.5	115	0.87	6.72	4.16	1.89	1.49	0.79	8.63	AA	CC
106	Normal control	59	Male	Never	Drinking	No	135	86	64	31.55	112.5	106.5	1.06	4.32	2.9	0.91	1.12	1.23	4.11	AG	CG
107	Normal control	45	Female	Never	Never	No	147	82	97	34.15	107.5	109.5	0.98	5.09	3.21	1.11	1.67	1.5	6.92	AA	CG
108	Hypercholesterolemia	52	Female	Smoking	Drinking	No	123	80	79	32.15	98.5	106	0.93	6.05	3.8	1.29	2.1	1.62	2.01	AG	CG
109	Normal control	36	Female	Never	Never	No	111	82	86	31.05	107	109.5	0.98	4.22	2.56	1.29	0.77	0.59	0.21	AG	CG
110	Hypercholesterolemia	51	Male	Never	Drinking	No	153	83	82	27.79	90.5	97	0.93	5.59	3.7	1.34	1.2	0.89	1.24	AG	GG
111	Hypercholesterolemia	43	Female	Never	Never	No	100	60	79	22.99	75.5	88	0.86	5.84	3.39	1.27	2.61	2.06	6.45	AG	CG
112	Normal control	53	Female	Never	Never	No	123	77	79	32.26	111	106	1.05	4.4	2.53	1.09	1.72	1.58	0.23	AA	CG
113	Hypercholesterolemia	58	Female	Never	Never	No	122	66	70	22.99	79	86	0.92	6.98	4.81	1.5	1.45	0.96	9.65	GG	GG
114	Hypercholesterolemia	41	Female	Never	Never	No	124	86	87	28.36	98	97	1.01	5.66	3.85	1.5	0.67	0.44	5.39	AG	CC
115	Hypercholesterolemia	45	Female	Never	Never	No	106	72	89	31.1	104	103	1.01	5.59	3.9	1.11	1.26	1.14	0.33	AG	CG
116	Hypercholesterolemia	58	Female	Never	Never	No	110	65	77	24.83	82.5	94	0.88	6.71	4.32	1.32	3.82	2.89	4.89	AA	CC
117	Hypercholesterolemia	42	Female	Never	Never	No	121	84	84	30.09	89.5	100	0.9	6.83	4.24	1.34	2.69	2	0.73	AA	CG
118	Hypercholesterolemia	42	Female	Never	Never	No	120	77	70	33.91	111.3	113	0.98	6.23	3.85	1.47	1.96	1.33	0.15	AA	CC
119	Normal control	57	Female	Never	Never	No	151	81	78	27.16	91.5	99	0.92	4.76	2.97	1.34	0.97	0.72	0.17	AA	CC
120	Normal control	39	Female	Never	Never	No	108	75	72	29.86	91.5	102	0.9	4.47	2.82	1.22	0.98	0.81	2.92	AA	CG
121	Normal control	39	Male	Never	Never	No	126	73	65	20.6	74	87.5	0.85	4.47	2.46	1.53	1.07	0.7	0.15	AA	CC
122	Normal control	42	Female	Never	Never	No	114	77	95	34.41	108	116.4	0.93	4.97	2.97	1.58	0.89	0.57	0.15	AG	CG
123	Normal control	42	Female	Never	Never	No	110	66	74	20.96	78.5	91	0.86	4.94	3.05	1.66	0.49	0.29	8	AA	CG
124	Hypercholesterolemia	40	Female	Never	Never	No	109	69	86	26.46	84.5	92	0.92	5.77	3.67	1.76	0.72	0.41	9	GG	CG
125	Hypercholesterolemia	45	Female	Never	Drinking	No	143	95	80	27.19	89.5	106.5	0.84	4.84	2.48	1.09	2.79	2.57	8.75	AA	CC
126	Hypercholesterolemia	54	Female	Never	Never	Yes	119	68	71	29.93	99	103.5	0.96	6.23	3.75	1.47	2.18	1.48	3.64	AA	CC
127	Hypercholesterolemia	56	Female	Never	Never	No	124	81	66	18.89	73.5	83	0.89	5.51	4.03	0.96	1.13	1.18	1.14	AG	CC
128	Hypercholesterolemia	38	Female	Never	Never	No	127	89	77	30.18	92.5	94.5	0.98	5.51	3.67	1.03	1.77	1.71	3.93	AA	CG
129	Normal control	40	Female	Never	Never	No	102	68	63	28.31	101	95.5	1.06	5.09	3.13	1.37	1.32	0.96	9.19	AA	CC
130	Hypercholesterolemia	55	Male	Smoking	Never	Yes	124	82	77	31.57	107.5	103.5	1.04	5.51	2.69	0.98	4	4.07	0.16	AA	CC
131	Hypercholesterolemia	58	Male	Smoking	Drinking	No	132	92	77	26.76	92	92.5	0.99	5.15	3.1	0.96	2.38	2.49	0.84	AA	CC
132	Normal control	51	Female	Never	Never	No	124	89	80	30.09	102	109.5	0.93	3.34	2.15	0.96	0.51	0.53	0.31	AA	CC
133	Normal control	37	Male	Never	Drinking	No	104	44	80	28.31	87.5	91	0.96	4.94	3.34	1.09	1.14	1.05	3.82	GG	GG
134	Hypercholesterolemia	49	Male	Smoking	Drinking	No	135	90	84	25.18	81.5	95.5	0.85	5.25	3.36	0.75	2.5	3.33	3.2	GG	GG
135	Normal control	45	Female	Never	Never	No	117	81	66	25.82	89.4	93.5	0.96	4.65	2.84	1.42	0.84	0.59	4.11	AG	CG
136	Normal control	51	Female	Never	Never	No	95	56	73	21.51	79.5	87.5	0.91	3.72	2.38	0.83	1.13	1.36	2.85	AG	CC
137	Normal control	42	Female	Never	Drinking	No	127	86	75	29.6	94	108.5	0.87	5.66	3.21	1.84	1.34	0.73	1.65	AA	CC
138	Normal control	56	Female	Never	Never	No	117	67	74	20.75	74.2	88.5	0.84	4.29	1.99	2.02	0.63	0.31	2.2	AA	CC
139	Hypercholesterolemia	57	Male	Smoking	Drinking	No	133	82	76	23.85	86	89.5	0.96	4.97	2.46	1.16	2.91	2.5	0.18	AA	CG
140	Normal control	52	Female	Never	Never	No	112	73	89	31.7	105.5	110.5	0.95	4.76	2.53	1.53	1.51	0.99	0.17	AA	CC
141	Normal control	41	Male	Never	Never	No	118	83	87	27.42	97	95.5	1.02	3.8	2.2	1.01	1.28	1.26	6.91	AG	CG
142	Hypercholesterolemia	38	Female	Never	Never	No	134	87	73	32.02	98	104	0.94	5.2	3.13	0.8	2.74	3.42	0.39	AG	CG
143	Hypercholesterolemia	45	Female	Never	Never	No	133	75	90	22.62	76.5	88.5	0.86	6.08	4.06	1.5	1.11	0.74	0.19	AA	CG
144	Normal control	45	Female	Never	Never	No	103	62	73	19.15	73.5	81	0.91	2.53	1.32	0.67	1.16	1.73	1.32	AA	CC
145	Hypercholesterolemia	58	Female	Never	Never	No	129	69	92	30.03	89.5	103.5	0.86	5.38	3.21	1.27	1.95	1.54	5.94	AG	CG
146	Normal control	47	Female	Never	Never	No	96	56	65	31.99	93.5	112	0.83	4.42	2.66	1.06	1.54	1.45	1.2	AG	CC
147	Hypercholesterolemia	45	Female	Never	Drinking	No	119	59	96	22.35	75.5	88.5	0.85	5.35	2.38	1.91	2.34	1.22	0.66	AA	CC
148	Normal control	49	Male	Smoking	Drinking	No	125	75	77	21.4	74.4	85.5	0.87	4.94	1.97	1.76	2.65	1.51	1.65	AG	CG
149	Hypercholesterolemia	51	Female	Never	Never	No	155	86	87	28.03	93	93.5	0.99	6.85	4.11	1.71	2.25	1.32	0.35	AG	CC
150	Hypercholesterolemia	46	Female	Never	Never	No	136	87	59	25.38	81.5	91.5	0.89	6.05	3.75	1.58	1.56	0.99	5.03	AA	CC
151	Hypercholesterolemia	45	Male	Smoking	Drinking	No	131	85	79	29.92	96	106.5	0.9	7.99	5.43	1.84	1.59	0.87	4.92	AG	CC
152	Normal control	42	Female	Never	Never	No	92	65	73	17.89	65	81	0.8	3.7	2.02	1.19	1.07	0.9	0.14	AG	CC
153	Normal control	48	Female	Never	Never	No	119	72	77	22.17	72	90.5	0.8	4.19	2.2	1.55	0.96	0.62	0.72	AA	CG
154	Normal control	50	Male	Never	Drinking	No	122	66	69	21.27	72	87.5	0.82	4.14	2.51	1.27	0.78	0.61	0.86	AA	CC
155	Normal control	43	Female	Never	Never	No	120	76	98	21.38	76.5	89	0.86	4.55	2.66	1.27	1.38	1.09	0.71	AA	CC
156	Hypercholesterolemia	47	Female	Never	Never	No	132	73	73	28.34	97	101	0.96	4.65	2.43	0.96	2.78	2.9	2.13	AA	CG
157	Hypercholesterolemia	52	Female	Smoking	Drinking	No	107	68	76	19.19	74.5	86	0.87	4.11	1.84	1.09	2.59	2.38	0.16	AA	CC
158	Normal control	54	Female	Never	Drinking	No	108	62	70	18.51	70.5	83	0.85	4.45	2.28	1.37	1.77	1.29	0.32	AA	CG
159	Normal control	38	Female	Never	Drinking	No	136	96	76	23.95	77.3	95.5	0.81	4.47	2.15	2.12	0.47	0.22	1.42	GG	GG
160	Normal control	50	Female	Never	Drinking	No	122	70	55	19.87	74.5	84	0.89	4.78	2.66	1.86	0.56	0.3	0.18	AA	CC
161	Normal control	39	Female	Never	Drinking	No	102	72	74	27.99	87.5	103.5	0.85	4.71	2.61	1.6	1.1	0.68	3.46	AG	CG
162	Hypercholesterolemia	47	Female	Never	Drinking	Yes	113	81	81	27.78	87	99.5	0.87	7.34	4.63	1.5	1.32	0.88	0.18	AA	CG
163	Normal control	41	Male	Smoking	Never	No	118	76	88	20.95	73	91	0.8	4.63	2.84	1.27	1.15	0.91	5.12	AG	CG
164	Hypercholesterolemia	54	Female	Smoking	Drinking	No	113	80	69	27.87	88	101	0.87	6.7	4.81	1.01	1.9	1.88	6.08	AG	GG
165	Normal control	47	Female	Never	Never	No	127	83	113	32.2	92.5	113.5	0.81	3.52	2.12	1.01	0.82	0.82	1.11	AG	GG
166	Normal control	46	Female	Never	Never	No	109	74	100	25.41	89	95.5	0.93	3.78	2.12	1.29	0.78	0.6	1.1	AA	GG
167	Normal control	52	Female	Never	Drinking	No	116	69	89	19.59	77	84.5	0.91	4.63	2.09	1.99	0.81	0.41	0.39	AA	CC
168	Normal control	55	Male	Smoking	Drinking	No	122	76	61	25.08	85	90	0.94	4.27	2.12	1.27	1.91	1.51	0.19	AA	CC
169	Normal control	52	Female	Never	Never	No	120	76	56	29.16	90	106	0.85	4.01	2.2	1.4	0.88	0.63	1.42	AG	CG
170	Hypercholesterolemia	57	Male	Smoking	Drinking	No	121	80	72	23.76	83	90.5	0.92	5.43	3.44	1.24	1.65	1.33	0.7	AA	CG
171	Normal control	40	Male	Smoking	Drinking	No	124	76	84	21.18	74.4	86	0.87	4.27	1.78	2.04	0.65	0.32	2.08	AG	GG
172	Normal control	40	Male	Smoking	Drinking	No	117	74	71	17.69	65	80.5	0.81	3.9	1.58	1.86	0.99	0.53	0.7	AA	CC
173	Hypercholesterolemia	45	Female	Never	Never	No	111	80	104	27.31	93	97	0.96	5.12	3.59	1.01	1.12	1.11	1.41	AG	GG
174	Hypercholesterolemia	50	Male	Never	Drinking	No	136	79	75	27.11	95.5	99	0.96	5.2	3.15	1.11	2.02	1.82	3.16	AA	CC
175	Hypercholesterolemia	43	Female	Never	Never	No	128	65	65	36.81	108	113	0.96	5.46	3.44	1.01	2.21	2.19	5.74	AG	GG
176	Hypercholesterolemia	54	Male	Never	Never	No	127	84	93	26.9	87	98.5	0.88	5.92	3.7	1.37	1.86	1.36	1.51	AG	CG
177	Normal control	41	Female	Never	Never	No	115	69	65	29.59	95	102	0.93	4.81	2.97	1.24	1.29	1.04	0.3	AG	GG
178	Hypercholesterolemia	49	Female	Never	Never	No	128	72	74	28	94	97.5	0.96	5.4	3.28	1.78	0.75	0.42	1.97	GG	GG
179	Normal control	44	Female	Never	Never	No	104	61	69	22.35	79.5	91.5	0.87	4.45	2.46	1.53	1	0.66	1.82	AG	CG
180	Hypercholesterolemia	42	Female	Never	Never	No	106	76	65	25.76	84	98	0.86	5.51	3.18	2.02	0.68	0.34	1.6	AG	CG
181	Hypercholesterolemia	50	Male	Smoking	Drinking	Yes	149	95	79	28.86	97	103	0.94	5.12	3.05	1.27	1.74	1.37	2.39	AG	CG
182	Normal control	60	Male	Smoking	Drinking	No	150	81	69	25.63	91.5	94.5	0.97	3.59	2.15	1.01	0.94	0.93	0.31	AA	CG
183	Normal control	46	Female	Never	Never	No	106	59	62	21.62	78	86.5	0.9	4.89	2.97	1.6	0.68	0.42	7.19	AA	CC
184	Normal control	51	Female	Never	Never	No	112	71	96	22.75	91.5	94	0.97	3	1.81	0.83	0.77	0.93	0.93	AA	CC
185	Hypercholesterolemia	43	Female	Never	Drinking	No	123	78	83	28.44	92.5	102.5	0.9	6.72	4.32	1.47	2.01	1.36	1.32	AG	CG
186	Hypercholesterolemia	46	Male	Smoking	Drinking	No	148	89	85	31.73	102.5	99.5	1.03	6.88	4.48	0.96	2.52	2.63	2.16	AA	CC
187	Normal control	48	Female	Smoking	Never	No	143	84	92	34.77	108.5	115.5	0.94	3.54	2.15	0.85	1.2	1.4	0.36	AA	CC
188	Normal control	53	Male	Smoking	Never	Yes	141	96	94	23.35	78	85.5	0.91	4.42	2.92	1.22	0.61	0.5	0.17	AA	CC
189	Hypercholesterolemia	54	Male	Smoking	Drinking	No	143	73	91	26.27	88.3	95	0.93	6.21	3.85	1.01	2.96	2.93	0.17	AA	CC
190	Normal control	35	Female	Never	Drinking	No	136	95	89	27.33	85	104	0.82	3.31	1.68	1.16	1	0.86	0.63	AA	CC
191	Normal control	48	Female	Never	Drinking	No	145	104	85	22.45	82	95	0.86	5.07	2.84	1.6	1.37	0.85	0.39	AG	CC
192	Hypercholesterolemia	40	Female	Never	Never	Yes	125	83	101	27.68	88.5	100.5	0.88	4.34	2.12	1.19	2.28	1.92	1.5	AG	CG
193	Normal control	54	Male	Smoking	Never	No	135	83	78	24.44	87.5	96	0.91	4.19	2.53	1.24	0.88	0.71	0.18	AA	CG
194	Normal control	37	Female	Never	Never	No	119	63	92	23.21	77	95	0.81	3.54	2.02	1.22	0.68	0.56	0.19	AA	CC
195	Normal control	42	Male	Smoking	Drinking	No	142	83	78	20.61	69	79.5	0.87	4.94	3.39	1.24	0.7	0.56	1.2	AA	CC
196	Normal control	27	Male	Never	Drinking	No	119	77	58	23.95	82	90	0.91	4.01	2.12	1.27	1.35	1.07	0.22	AA	CG
197	Normal control	38	Male	Smoking	Never	No	107	74	51	17.26	62	72	0.86	3.93	2.28	1.14	1.12	0.98	0.17	AA	CG
198	Normal control	37	Male	Smoking	Drinking	No	110	65	67	20.48	79	93	0.85	4.37	2.25	1.63	1.07	0.66	0.27	AA	CG
199	Normal control	44	Female	Never	Never	No	121	79	75	25.8	81.5	97.5	0.84	4.24	2.59	1.37	0.63	0.46	0.28	AA	CG
200	Hypercholesterolemia	42	Female	Never	Never	No	148	91	93	30.3	89.3	102.5	0.87	5.74	3.49	1.29	2.08	1.61	1.21	GG	CG
201	Normal control	36	Female	Never	Never	No	126	96	86	25.01	78	95	0.82	4.14	2.79	0.91	0.97	1.07	0.67	AA	CC
202	Hypercholesterolemia	38	Female	Never	Never	No	149	102	108	28.95	88.5	102	0.87	4.42	1.73	1.42	2.78	1.95	1.53	AA	CC
203	Hypercholesterolemia	49	Female	Never	Never	No	139	95	90	36.33	103	109	0.94	3.93	2.07	0.88	2.16	2.45	0.37	AA	CC
204	Hypercholesterolemia	44	Female	Never	Never	No	100	60	77	22.33	70	87	0.8	3.67	2.25	1.11	0.65	0.59	9.25	GG	CC
205	Normal control	39	Female	Never	Never	No	107	71	76	30.8	94	109	0.86	4.55	2.95	1.14	1.02	0.89	0.16	AA	CC
206	Normal control	44	Male	Smoking	Never	No	131	92	66	29.89	92	99	0.93	4.29	2.95	0.83	1.12	1.35	0.18	AA	CG
207	Hypercholesterolemia	56	Female	Never	Never	No	147	87	75	22.44	76	88.5	0.86	5.04	3.26	0.72	2.3	3.18	1.16	AG	CG
208	Normal control	57	Male	Smoking	Never	No	130	83	66	23.36	85	89	0.96	3.31	2.4	0.57	0.73	1.29	1.12	AA	CC
209	Normal control	45	Male	Smoking	Drinking	Yes	127	77	67	23.35	77.5	91	0.85	3.03	1.71	0.88	0.98	1.12	0.65	AA	CC
210	Normal control	38	Female	Never	Never	No	114	77	80	24.3	76	86.5	0.88	3.9	1.97	1.47	1.03	0.7	1.42	AA	CG
211	Normal control	52	Female	Never	Never	No	130	71	75	21.91	73.5	91	0.81	4.27	2.15	1.89	0.51	0.27	1.46	GG	GG
212	Normal control	43	Female	Never	Never	No	116	76	81	24.15	82.2	90.5	0.91	2.95	1.76	0.83	0.78	0.94	0.92	AA	CC
213	Normal control	36	Female	Never	Never	No	116	72	80	33.24	95.5	110	0.87	4.68	2.9	1.4	0.84	0.6	0.33	AG	CG
214	Normal control	57	Female	Never	Drinking	No	153	92	87	29.66	107	109	0.98	4.37	2.9	1.14	0.76	0.66	0.54	AA	CC
215	Hypercholesterolemia	51	Female	Never	Never	No	129	81	70	28.09	90	107	0.84	5.43	3.72	1.32	0.85	0.64	1.44	AA	CC
216	Normal control	50	Female	Never	Never	No	130	84	65	28.49	88.3	99	0.89	3.44	1.73	1.19	1.12	0.94	6.48	AA	CC
217	Hypercholesterolemia	51	Female	Never	Never	No	125	84	63	22.37	76.8	86.2	0.89	6.49	4.42	1.4	1.47	1.05	8.91	AA	CC
218	Normal control	45	Female	Never	Never	Yes	130	81	79	32.85	101.9	107.9	0.94	4.27	2.4	1.29	1.23	0.95	0.53	AA	CC
219	Hypercholesterolemia	45	Female	Never	Never	No	125	76	69	20.14	65.5	86.5	0.76	5.64	3.23	1.91	1.08	0.57	0.53	AA	CC
220	Hypercholesterolemia	39	Female	Never	Never	Yes	114	73	91	20.48	70	91.7	0.76	5.79	3.59	1.78	0.89	0.5	8.17	AG	CG
221	Normal control	43	Female	Never	Never	No	108	66	79	18.47	68.5	80.5	0.85	4.47	2.79	1.22	0.99	0.82	3.18	AA	CG
222	Normal control	51	Female	Never	Drinking	Yes	108	67	63	28.12	92.5	101.7	0.91	4.71	3.15	1.09	0.99	0.91	1.03	AA	CC
223	Hypercholesterolemia	44	Male	Smoking	Never	Yes	121	85	73	23.2	82.9	87.5	0.95	4.97	3.41	0.78	1.68	2.17	0.24	AG	CC
224	Normal control	52	Male	Smoking	Drinking	No	105	73	64	24	80.7	89.7	0.9	4.42	3.26	0.7	1.04	1.49	0.26	AA	CG
225	Normal control	44	Female	Never	Never	No	105	68	82	20.17	71	91	0.78	4.6	2.43	1.78	0.82	0.46	1.71	AG	CG
226	Normal control	49	Male	Smoking	Drinking	No	97	71	74	18.42	65	82	0.79	4.29	1.84	1.76	1.51	0.86	4.01	AA	CC
227	Hypercholesterolemia	52	Female	Never	Never	No	123	71	64	30.51	90	102.8	0.88	3.7	1.84	1.24	1.38	1.11	2.13	GG	GG
228	Hypercholesterolemia	43	Female	Never	Drinking	No	142	90	101	28.91	94.5	100.5	0.94	6.05	4.01	1.53	1.15	0.75	8.14	AG	CC
229	Hypercholesterolemia	59	Male	Smoking	Drinking	Yes	154	85	69	23.36	85.3	92	0.93	4.91	3.15	0.85	1.95	2.29	0.16	AA	CG
230	Hypercholesterolemia	43	Male	Smoking	Drinking	No	118	81	72	29.88	101.5	107	0.95	2.62	1.33	1.19	1.82	1.53	4.82	AA	CC
231	Hypercholesterolemia	55	Female	Smoking	Drinking	No	118	76	74	25.56	78.7	93.5	0.84	6.83	4.76	1.14	2.03	1.79	3.13	AG	CG
232	Normal control	53	Male	Smoking	Drinking	No	99	73	82	18.99	72.5	84.5	0.86	4.99	3.15	1.47	0.8	0.54	2.8	AA	CG
233	Normal control	51	Male	Smoking	Drinking	No	105	72	71	20.57	73	83	0.88	4.47	2.69	1.45	0.75	0.51	6.91	AG	CC
234	Hypercholesterolemia	48	Female	Never	Drinking	No	102	74	67	24.34	83.5	97	0.86	6.08	3.41	1.34	2.86	2.12	0.15	AA	CG
235	Normal control	38	Female	Never	Never	No	112	74	66	24.02	78.8	90.7	0.87	3.93	2.4	0.78	1.63	2.1	2.22	AA	CC
236	Normal control	52	Female	Never	Never	No	106	73	75	22.26	73.5	86.5	0.85	4.5	3.05	1.11	0.76	0.68	0.57	AA	CG
237	Hypercholesterolemia	39	Female	Never	Never	No	123	65	76	26.84	94.5	96.5	0.98	5.3	3.05	0.8	3.16	3.94	1.13	AG	CG
238	Normal control	44	Male	Never	Drinking	Yes	128	73	64	26.76	88.5	95	0.93	5.53	3.28	1.6	1.39	0.87	0.3	AA	CC
239	Normal control	56	Female	Never	Drinking	No	103	64	74	19.09	69	82	0.84	4.11	2.56	1.06	1.1	1.03	1.29	AA	CG
240	Normal control	42	Female	Never	Drinking	No	141	89	73	22.25	77.2	86	0.9	3.41	1.71	1.5	0.44	0.29	4.74	AA	CG
241	Hypercholesterolemia	34	Female	Never	Never	No	117	87	90	28.11	86	96.5	0.89	3.83	2.15	0.85	1.82	2.13	0.39	AG	CG
242	Normal control	47	Female	Never	Never	No	110	69	91	18.49	64.5	83.5	0.77	3.21	1.47	1.24	1.1	0.88	1.19	AA	CG
243	Normal control	52	Female	Never	Never	No	113	78	80	20.32	70	86.5	0.81	4.32	2.48	1.16	1.49	1.28	0.23	AA	CG
244	Normal control	45	Male	Never	Drinking	No	135	85	77	26.73	88.3	97	0.91	3.57	2.04	0.88	1.41	1.61	2.86	AA	CC
245	Normal control	41	Female	Never	Never	No	106	78	83	22.26	76.5	90	0.85	3.98	2.04	1.45	1.1	0.76	0.33	AA	CG
246	Normal control	55	Female	Never	Never	No	128	69	71	22.34	74.4	84	0.89	5.22	2.97	1.47	1.68	1.14	1.12	AA	CC
247	Hypercholesterolemia	41	Female	Never	Never	No	140	85	108	24.44	82	92.4	0.89	5.9	3.54	1.42	2.05	1.44	2.02	AG	CC
248	Hypercholesterolemia	44	Male	Never	Never	No	120	76	76	25.54	89.4	93.9	0.95	5.48	3.47	1.66	0.77	0.46	3.32	AA	CG
249	Normal control	37	Female	Never	Drinking	No	175	103	85	19.23	74.2	85	0.87	5.2	2.22	2.07	1.65	0.8	1.61	AG	CC
250	Normal control	52	Female	Never	Drinking	No	122	88	106	24.29	84.7	92.8	0.91	5.12	3.13	1.32	1.46	1.1	0.19	AG	CG
251	Hypercholesterolemia	37	Female	Never	Never	No	126	87	69	31.17	101.7	109	0.93	5.69	3.03	1.66	2.21	1.34	1.32	AG	CG
252	Normal control	53	Female	Smoking	Drinking	No	118	85	84	17.51	66.4	83	0.8	3.54	1.66	1.19	1.54	1.29	0.15	AG	CG
253	Hypercholesterolemia	37	Female	Never	Never	No	111	78	81	23.88	81.5	96.7	0.84	6.26	4.01	1.78	0.99	0.56	0.48	AA	CC
254	Normal control	44	Female	Never	Never	No	123	78	112	33.08	97.5	114.5	0.85	4.09	2.02	1.37	1.54	1.12	0.53	AA	CG
255	Normal control	39	Female	Never	Never	Yes	130	74	85	32.28	92.4	110	0.84	4.29	2.2	1.68	0.88	0.52	1.8	AA	CC
256	Hypercholesterolemia	48	Female	Never	Never	No	137	93	70	28.19	85.3	102.3	0.83	5.35	3.67	1.19	1.1	0.92	0.85	AA	CG
257	Hypercholesterolemia	52	Female	Never	Never	No	156	83	80	29.05	95.5	102.2	0.93	6.49	4.19	1.42	1.92	1.35	1.86	AG	CG
258	Hypercholesterolemia	39	Female	Never	Never	No	126	85	99	33.13	114.4	115.5	0.99	4.09	2.61	0.59	1.93	3.25	3.11	AG	GG
259	Hypercholesterolemia	50	Male	Smoking	Drinking	No	107	71	72	25.61	96.4	99.2	0.97	5.95	3.34	1.66	2.1	1.27	2.31	AA	CC
260	Normal control	45	Female	Never	Never	No	117	69	75	23.87	77.2	94.5	0.82	3.28	1.99	0.96	0.71	0.74	5.76	AG	GG
261	Normal control	48	Female	Never	Never	Yes	136	88	72	33.26	93	109	0.85	2.82	1.81	0.7	0.7	1	1.17	AA	GG
262	Normal control	46	Female	Never	Never	No	150	87	88	25.89	93.3	100.4	0.93	3.62	1.97	1.06	1.28	1.2	2.01	AA	GG
263	Hypercholesterolemia	46	Female	Never	Never	No	122	88	105	25.03	82.2	91.7	0.9	4.42	2.59	0.83	2.22	2.69	2	AG	CG
264	Normal control	51	Female	Never	Never	No	118	74	78	19.09	66	84.5	0.78	4.63	3	1.14	1.07	0.94	8.66	AA	CG
265	Hypercholesterolemia	57	Female	Never	Never	No	107	66	70	18.65	70.6	84	0.84	5.61	3.72	1.4	1.06	0.76	2.99	AA	CC
266	Normal control	39	Male	Smoking	Drinking	No	94	54	79	20.25	73.5	85	0.86	3.39	1.94	1.03	0.93	0.89	4.08	AG	CG
267	Normal control	46	Female	Never	Never	No	124	84	74	32.7	100	114.5	0.87	3.65	2.35	0.91	0.82	0.91	4.99	AA	CG
268	Hypercholesterolemia	57	Male	Never	Never	No	135	85	68	26.6	89.3	96	0.93	2.35	0.75	0.39	2.68	6.9	1.5	AA	CG
269	Normal control	54	Female	Never	Never	No	132	76	85	23.35	82	93.5	0.88	4.22	2.64	1.14	0.94	0.82	3.92	AA	CC
270	Hypercholesterolemia	44	Female	Never	Never	No	164	92	96	29.75	95.2	102.2	0.93	3.47	1.78	0.8	1.94	2.42	0.2	AA	CC
271	Normal control	55	Female	Never	Never	No	127	67	88	22.28	74.7	83	0.9	3.08	1.29	1.47	0.65	0.44	2.11	GG	CC
272	Hypercholesterolemia	38	Female	Never	Drinking	No	127	90	95	29.82	93.5	105	0.89	4.47	1.89	0.75	3.99	5.31	3.77	AG	CC
273	Hypercholesterolemia	50	Male	Smoking	Drinking	No	137	89	82	16.99	64	82	0.78	5.38	3.52	1.5	0.79	0.53	0.26	AG	CG
274	Normal control	47	Male	Smoking	Drinking	No	135	76	71	26.24	91.8	100.5	0.91	4.63	2.95	1.19	1.05	0.88	4.1	AG	CG
275	Normal control	53	Female	Never	Never	No	143	89	83	28.11	95.4	100.5	0.95	3.03	1.66	0.78	1.3	1.67	0.78	AG	CC
276	Normal control	54	Female	Never	Never	No	128	87	72	24.81	83.7	93	0.9	3.7	2.48	0.88	0.76	0.86	0.96	AA	CC
277	Hypercholesterolemia	51	Female	Never	Never	No	137	84	91	34.9	104.5	114	0.92	5.15	2.87	1.42	1.85	1.3	1.59	GG	CC
278	Hypercholesterolemia	45	Female	Never	Never	Yes	148	90	80	30.78	90	101	0.89	5.46	3.31	1.11	2.25	2.02	0.19	AG	CG
